# Supplementary material
Source: HighWire-hosted journal article supplement (https://bmjopen.bmj.com/content/11/3/e044246)
Supplement: inline-supplementary-material-2 [file inline-supplementary-material-2.pdf]

**Supplementary Table 2: Sex differential of characteristics involved in the study**

| Characteristics                        | Sex differential |            | Rao-Scott $\chi^2$ |
|----------------------------------------|------------------|------------|--------------------|
|                                        | Male             | Female     |                    |
|                                        | Weighted %       | Weighted % |                    |
| <b>Age group</b>                       |                  |            | <b>2.2</b>         |
| <=19                                   | 46.7             | 53.3       |                    |
| 20-29                                  | 43.4             | 56.6       |                    |
| 30-39                                  | 43.8             | 56.2       |                    |
| 40+                                    | 45.8             | 54.2       |                    |
| <b>Marital status</b>                  |                  |            | <b>143.98***</b>   |
| Married                                | 45.9             | 54.1       |                    |
| Separated/Divorced                     | 30.4             | 69.6       |                    |
| Widowed                                | 12.8             | 87.2       |                    |
| Never married                          | 53.2             | 46.8       |                    |
| <b>Educational level</b>               |                  |            | <b>18.42***</b>    |
| None                                   | 41.0             | 59.0       |                    |
| Primary                                | 39.9             | 60.1       |                    |
| JHS                                    | 47.0             | 53.0       |                    |
| SHS                                    | 48.4             | 51.6       |                    |
| Tertiary                               | 52.9             | 47.1       |                    |
| <b>Currently working</b>               |                  |            | <b>6.19**</b>      |
| No                                     | 44.1             | 55.9       |                    |
| Yes                                    | 47.6             | 52.4       |                    |
| <b>Weeks engaged in work/12 months</b> |                  |            | <b>4.07*</b>       |
| None                                   | 45.8             | 54.2       |                    |
| 1-9                                    | 44.4             | 55.6       |                    |
| 20+                                    | 42.6             | 57.4       |                    |
| <b>Religion</b>                        |                  |            | <b>59.14***</b>    |
| Christian                              | 42.6             | 57.4       |                    |
| Islam                                  | 48.3             | 51.7       |                    |
| Other                                  | 58.0             | 42.0       |                    |
| <b>HH size</b>                         |                  |            | <b>155.19***</b>   |
| 1 person                               | 62.3             | 37.7       |                    |
| 2-4 persons                            | 38.2             | 61.8       |                    |
| 5+ persons                             | 44.9             | 55.1       |                    |
| <b>Region</b>                          |                  |            | <b>0.82</b>        |
| Western                                | 46.1             | 53.9       |                    |
| Central                                | 43.4             | 56.6       |                    |
| GT. Accra                              | 45.0             | 55.0       |                    |
| Volta                                  | 42.8             | 57.2       |                    |
| Eastern                                | 45.6             | 54.4       |                    |
| Ashanti                                | 44.2             | 55.8       |                    |
| Brong Ahafo                            | 44.8             | 55.2       |                    |
| Northern                               | 46.5             | 53.5       |                    |
| Upper East                             | 46.6             | 53.4       |                    |

|                                     |      |      |                 |
|-------------------------------------|------|------|-----------------|
| Upper West                          | 44.4 | 55.6 |                 |
| <b>Place of residence</b>           |      |      | <b>7.14**</b>   |
| Urban                               | 43.7 | 56.3 |                 |
| Rural                               | 46.1 | 53.9 |                 |
| <b>Relationship to HH</b>           |      |      | <b>62371***</b> |
| HH head                             | 62.4 | 37.6 |                 |
| Spouse                              | 2.1  | 97.9 |                 |
| Child                               | 46.3 | 53.7 |                 |
| Other                               | 39.9 | 60.1 |                 |
| <b>Place of born</b>                |      |      | <b>8.02**</b>   |
| This village                        | 46.2 | 53.8 |                 |
| Different village                   | 43.3 | 56.7 |                 |
| <b>Engaged in non-farm activity</b> |      |      | <b>14.27***</b> |
| Yes                                 | 41.6 | 58.4 |                 |
| No                                  | 45.9 | 54.1 |                 |
| <b>Did any work for pay</b>         |      |      | <b>51.34***</b> |
| Yes                                 | 53.0 | 47.0 |                 |
| No                                  | 43.2 | 56.8 |                 |
| <b>Hours work/week</b>              |      |      | <b>5***</b>     |
| None                                | 42.3 | 57.7 |                 |
| 1-29                                | 45.3 | 54.7 |                 |
| 30+                                 | 47.4 | 52.6 |                 |
| <b>Visited any place outside HH</b> |      |      | <b>7.56**</b>   |
| Yes                                 | 46.7 | 53.3 |                 |
| No                                  | 44.0 | 56.0 |                 |
| <b>Wealth of asset</b>              |      |      | <b>7.37***</b>  |
| Low                                 | 42.7 | 57.3 |                 |
| Medium                              | 46.3 | 53.7 |                 |
| High                                | 46.0 | 54.0 |                 |
